# Supplementary material
Source: PubMed Central journal article supplement (PMC5473650)

**Figure 4.** Plots of geographic atrophy (GA) growth in 7 participants with bilateral GA. Participants in the top row had fellow eyes that had received anti-vascular endothelial growth factor (VEGF) treatment for neovascular disease during and/or before entering the study. Participants in the bottom row had fellow eyes that were non-neovascular and therefore never received anti-VEGF.

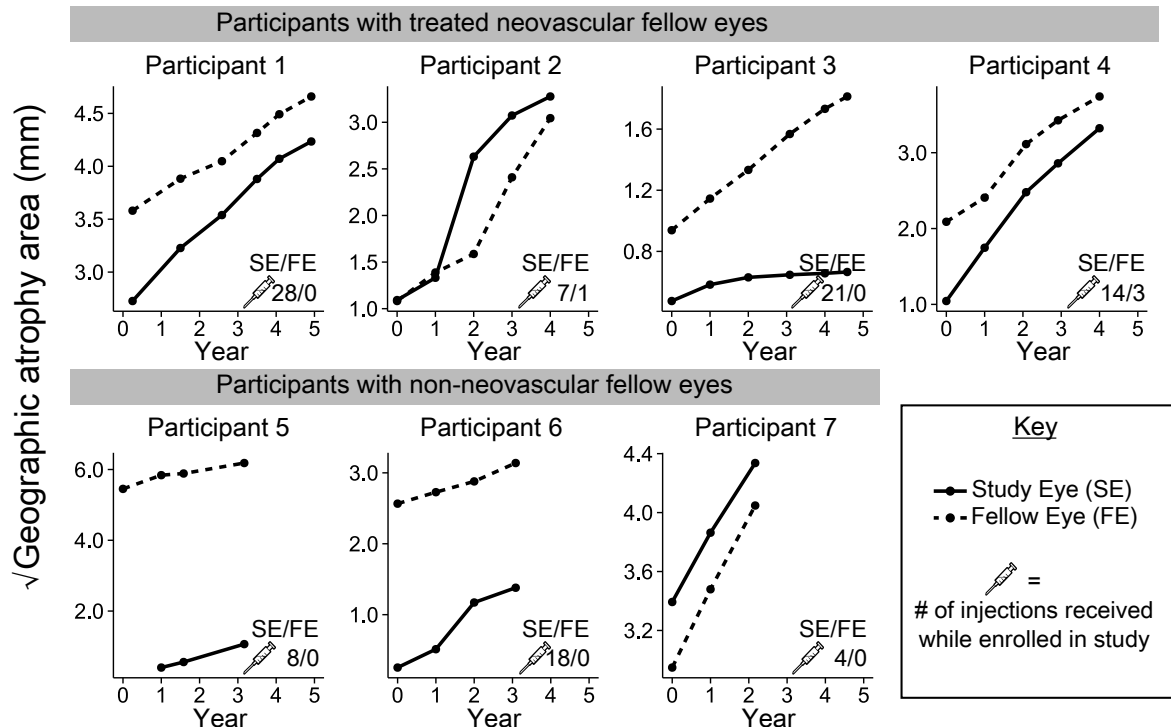

Supplement: NIHMS832254-supplement-1.pdf [file NIHMS832254-supplement-1.pdf]
