# Supplementary material
Source: PubMed Central journal article supplement (PMC5473650)
Supplement: NIHMS832254-supplement-3.pdf [file NIHMS832254-supplement-3.pdf]

**Table 4.** Characteristics of geographic atrophy in study eyes

| GA characteristic                                                         | All study eyes with GA<br>N=29<br>N (%) | Developed new GA<br>N=7<br>N (%) | GA present at baseline<br>N=22<br>N (%) |
|---------------------------------------------------------------------------|-----------------------------------------|----------------------------------|-----------------------------------------|
| Size at first observed date (mm <sup>2</sup> ) on fundus autofluorescence |                                         |                                  |                                         |
| <1.3                                                                      | 14 (48.3)                               | 5 (71.4)                         | 9 (40.9)                                |
| 1.3-4.0                                                                   | 3 (10.3)                                | 0                                | 3 (13.6)                                |
| 4.0-8.3                                                                   | 1 (3.5)                                 | 0                                | 1 (4.6)                                 |
| 8.3-14.1                                                                  | 3 (10.3)                                | 0                                | 3 (13.6)                                |
| Unquantifiable <sup>a</sup>                                               | 8 (27.6)                                | 2 (28.6)                         | 6 (27.3)                                |
| Proximity from center of fovea (mm) at first observed date                |                                         |                                  |                                         |
| ≤0.50                                                                     | 4 (13.8)                                | 1 (14.2)                         | 3 (13.6)                                |
| 0.51-1.0                                                                  | 5 (17.2)                                | 0                                | 5 (22.8)                                |
| 1.10-1.50                                                                 | 5 (17.2)                                | 2 (28.6)                         | 3 (13.6)                                |
| >1.50                                                                     | 4 (13.8)                                | 2 (28.6)                         | 2 (9.1)                                 |
| Unquantifiable <sup>a</sup>                                               | 11 (38.0)                               | 2 (28.6)                         | 9 (40.9)                                |
| Rate of growth <sup>b</sup> (mm/year)                                     |                                         |                                  |                                         |
| ≤0.20                                                                     | 7 (24.2)                                | 2 (28.6)                         | 5 (22.8)                                |
| 0.21-0.40                                                                 | 7 (24.2)                                | 3 (42.8)                         | 4 (18.2)                                |
| 0.41-0.6                                                                  | 3 (10.3)                                | 0                                | 3 (13.6)                                |
| >0.6                                                                      | 3 (10.3)                                | 0                                | 3 (13.6)                                |
| Unquantifiable <sup>a</sup>                                               | 9 (31.0)                                | 2 (28.6)                         | 7 (31.8)                                |
| GA location relative to CNV on ICG/FA                                     |                                         |                                  |                                         |
| Overlapping                                                               | 16 (55.2) /19 (65.6)                    | 3 (42.9) /2 (28.6)               | 13 (59.1) /17 (77.3)                    |
| Non-overlapping                                                           | 7 (24.1) /7 (24.1)                      | 3 (42.9) /4 (57.1)               | 4 (18.2) /3 (13.6)                      |
| Unknown                                                                   | 6 (20.7) /3 (10.3)                      | 1 (14.2) /1 (14.3)               | 5 (22.7) /2 (9.1)                       |

GA: geographic atrophy; CNV: choroidal neovascularization; ICG: indocyanine green angiography; FA: fluorescein angiography

<sup>a</sup> Unquantifiable GA characteristics due to concurrent fibrosis within the GA area, poor quality of images secondary to cataract, or obscured fovea from cataract, pigment, or hemorrhage.

<sup>b</sup> Rate of growth calculated using square root-transformed GA areas
